# Supplementary material
Source: publisher site journal article supplement (https://www.dovepress.com/get_supplementary_file.php?f=314581.docx)
Supplement: Supplementary file 1 [file get_supplementary_file.php]

| Supplementary Data - Conference A Itinerary | | | | |
| --- | --- | --- | --- | --- |
| 9:00 - 9:45 | Registration and Refreshments: Medical student volunteers registered participants, explaining the questionnaires and giving them their timetables. | | | |
| 9:45 - 10:45 | Lecture and Panel Discussion - Life in Healthcare: Lectures and panel discussion delivered by three practicing doctors: Dr Luke Cannon, A Core Medical Trainee; Dr Enam Haque a General Practitioner and supervisor of this project; Dr Clare Rayner, a Consultant in Occupational Medicine. | | | |
| 11:00 - 12:00 | Breakout Sessions | | | Participant Presentations In one of their presentation sessions, the participant delivered their own presentation. |
| Research and Evidence-Based Medicine: Delivered by Alfred So, a 4th year medical student volunteer. | Compassion in Medicine: Delivered by Holly Gibson, a 4th medical student volunteer. | Medical Ethics: Delivered by Lily Edwards, a 3rd year medical student volunteer. |
| 12:15 - 13:15 | Research and Evidence-Based Medicine | Compassion in Medicine | Medical Ethics | Participant Presentations |
| 13:15 - 14:00 | Lunch | | | |
| 14:00 - 15:00 | Professionalism in Medicine: Delivered by Clare Owen and Ioanna Maraki, representatives from the Medical Schools Council and General Medical Council respectively. | Public Health: Delivered by James Adams, a 4th year medical student volunteer with an interest in Public Health. | A Journey Through Healthcare: Delivered by Ben Ryan, a 4th year medical student who was leading the conference, on the topic of holistic medicine. | Participant Presentations |
| 15:15 - 16:15 | Professionalism in Medicine | Public Health | A Journey Through Healthcare | Participant Presentations |
| 16:30 - 17:00 | Prizes and Certificates:  Prizes, mostly books, were awarded to participants who were deemed to deliver the best presentation in their group or who contributed significantly to their sessions. | | | |
| Participants attended one ‘Breakout Session’ and one ‘Participant Presentations’ session in both the morning and the afternoon. | | | | |
